# Supplementary material
Source: publisher figshare collection journal article supplement (https://acs.figshare.com/ndownloader/files/5913195)
Supplement: Supplementary file 1 [file 5913195]

## Supporting Information

### **Catalytic Single Particle Nano-impacts: Theory and Experiment. Poly(vinylferrocene) Modified Graphene Nanoplatelet Mediated L-Cysteine Oxidation**

Qianqi Lin,<sup>§</sup> Chuhong Lin,<sup>§</sup> Haoyu Wu, Christopher Batchelor-McAuley, Richard G.

Compton\*

Department of Chemistry, Physical and Theoretical Chemistry Laboratory, Oxford University,  
South Parks Road, Oxford OX1 3QZ, U.K.

<sup>§</sup> Both authors contributed equally to this paper

\*To whom correspondence should be addressed

Email: [richard.compton@chem.ox.ac.uk](mailto:richard.compton@chem.ox.ac.uk)

Phone: +44 (0) 1865 275957

Fax: +44 (0) 1865 275410

## 1 Chronoamperometry of Degassing the Electrolyte Solution

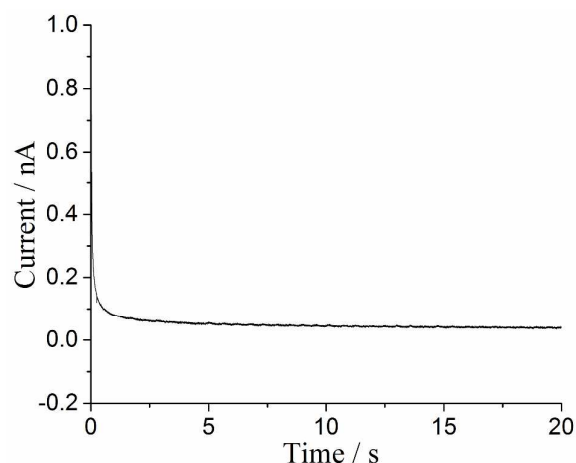

**Figure SI1** Chronoamperogram measured at the same time as nitrogen degassing, in a pH7 buffered aqueous solution supported with 0.1 M KCl, using a carbon fibre micro wire electrode. Potential applied = +1.00 V.

## 2 Choice of Supporting Electrolyte

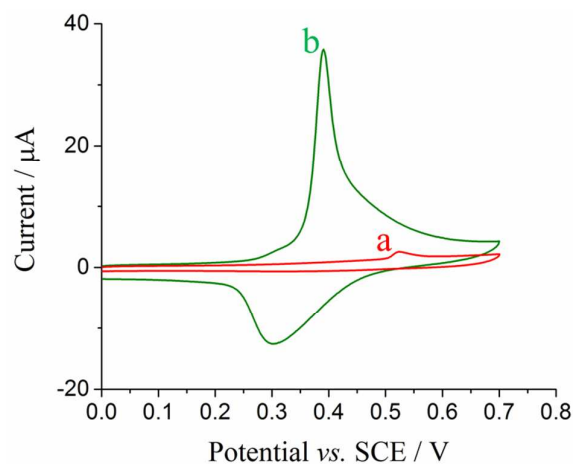

**Fig. SI2** Voltammograms measured in a nitrogen degassed pH 7 buffered aqueous solution, using a PVFc-GNPs modified edge-plane pyrolytic graphite (EPPG) electrode via abrasive modification. Solution supported with 0.1 M KCl (a) and 0.1 M  $\text{NaClO}_4$  (b). Scan rate =  $50 \text{ mV s}^{-1}$ .
